# Supplementary material
Source: publisher figshare collection journal article supplement (https://karger.figshare.com/ndownloader/files/30981388)
Supplement: Supplementary file 1 [file 30981388]

| Supplemental Table 1 | | | The mean values of distances from all points on the mask to the cochlear apex(CA) | | | | | | | |
| --- | --- | --- | --- | --- | --- | --- | --- | --- | --- | --- |
|  |  | A (25mm) | | B (30mm) | C (35mm) | D (40mm) | P | Pab | Pac | Pad |
| Control group | P20 | 40.08 ± 1.79 | | 43.21 ± 1.59 | 46.56 ± 1.50 | 49.90 ± 1.40 | <0.05 | <0.05 | <0.05 | <0.05 |
| N=30 | P30 | 40.26 ±1.74 | | 43.50 ± 1.57 | 46.98 ± 1.31 | 50.35 ± 1.40 | <0.05 | <0.05 | <0.05 | <0.05 |
|  | P40 | 40.30 ± 1.71 | | 43.71 ± 1.57 | 47.08 ± 1.47 | 50.68 ± 1.43 | <0.05 | <0.05 | <0.05 | <0.05 |
| CAA group | P20 | 41.75 ± 1.94 | | 44.76 ± 1.82 | 47.81 ± 1.78 | 51.52 ± 2.77 | <0.05 | <0.05 | <0.05 | <0.05 |
| N=30 | P30 | 42.28 ± 2.08 | | 45.27 ± 1.94 | 48.45 ± 1.86 | 51.75 ± 1.88 | <0.05 | <0.05 | <0.05 | <0.05 |
|  | P40 | 42.71 ± 2.21 | | 45.71 ± 2.08 | 48.94 ± 2.06 | 52.35 ± 2.07 | <0.05 | <0.05 | <0.05 | <0.05 |
| CAS group | P20 | 40.92 ± 1.04 | | 43.97 ± 1.08 | 47.10 ± 0.98 | 50.30 ± 0.85 | <0.05 | <0.05 | <0.05 | <0.05 |
| N=30 | P30 | 41.34 ± 1.07 | | 44.45 ± 1.09 | 47.45 ± 1.37 | 51.02 ± 1.16 | <0.05 | <0.05 | <0.05 | <0.05 |
|  | P40 | 41.13 ± 1.91 | | 44.89 ± 1.12 | 48.24 ± 1.20 | 51.62 ± 1.24 | <0.05 | <0.05 | <0.05 | <0.05 |
| Pab, Pac, Pad = p value for differences between A and B, between A and C, and between A and D, respectively | | | | | | | | | | |
